# Supplementary material for: New cyclometalated Ir(iii) complexes with NCN pincer and meso-phenylcyanamide BODIPY ligands as efficient photodynamic therapy agents
Source: Royal Society of Chemistry journal article supplement (doi:10.1039/c7ra05579j), 2017-01-01
Supplement: c7ra05579j1.pdf [file c7ra05579j1.pdf]

## Supplementary Information

### **New cyclometalated Ir(III) complexes with NCN pincer and meso-phenylcyanamide BODIPY ligands as efficient photodynamic therapy agents**

Leila Tabrizi <sup>\*a,b</sup>, Hossein Chiniforoshan <sup>\*b</sup>

<sup>a</sup> School of Chemistry, National University of Ireland, Galway, University Road, Galway, Ireland

<sup>b</sup> Department of Chemistry, Isfahan University of Technology, Isfahan, Iran

Corresponding author: Leila Tabrizi; Email: LEILA.TABRIZI@nuigalway.ie

Corresponding author: H. Chiniforoshan; Email: Chinif@cc.iut.ac.ir

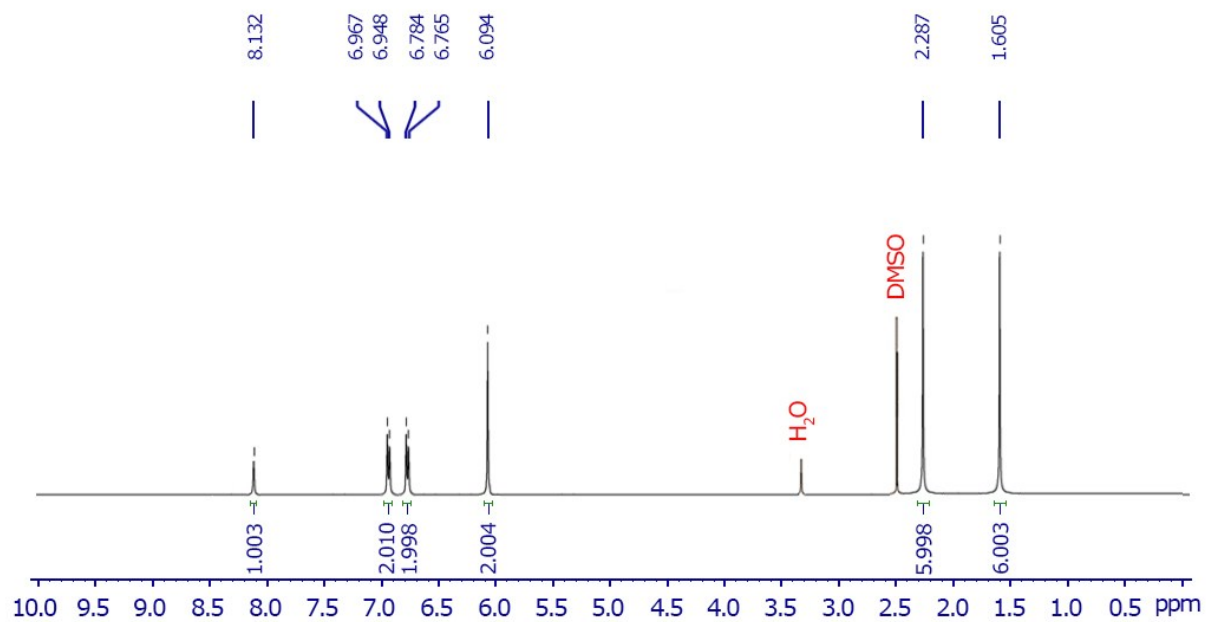

**Fig. S1.**  $^1\text{H}$  NMR spectrum of ligand Pcyd-BODIPY ( $\text{DMSO-}d_6$ ).

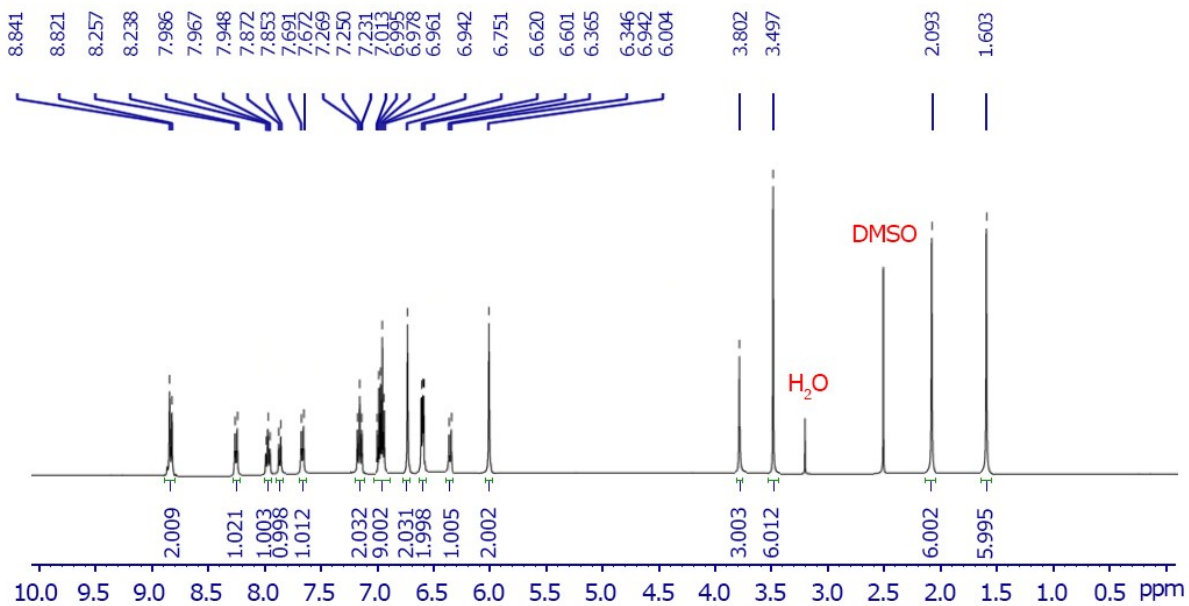

**Fig. S2.** <sup>1</sup>H NMR spectrum of complex **1** (DMSO-*d*<sub>6</sub>).

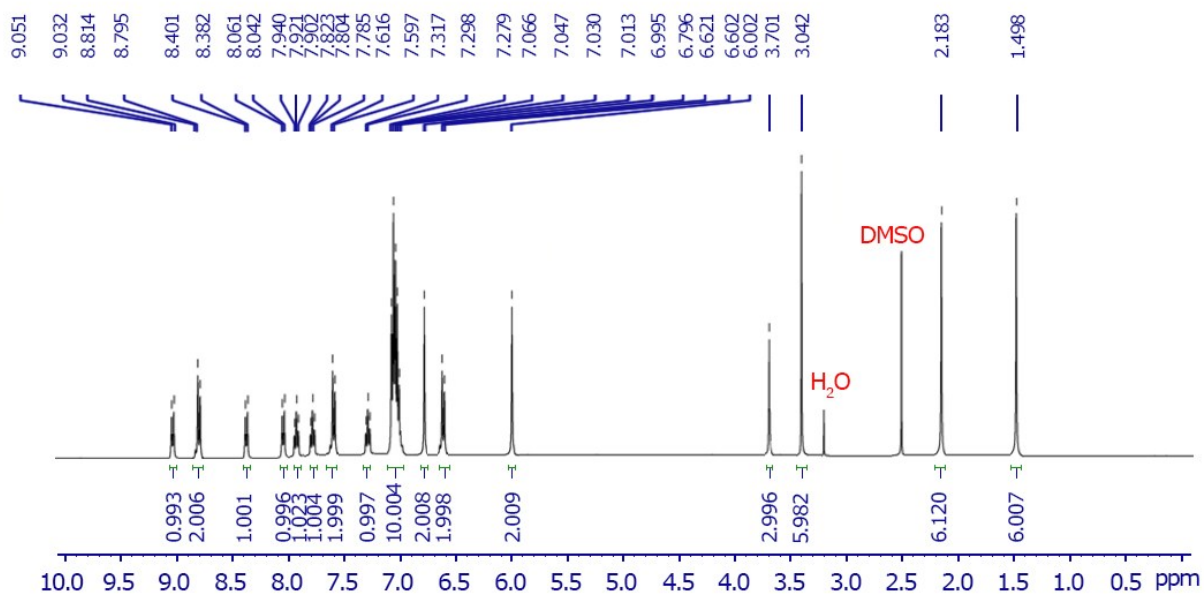

**Fig. S3.** <sup>1</sup>H NMR spectrum of complex **2** (DMSO-*d*<sub>6</sub>).

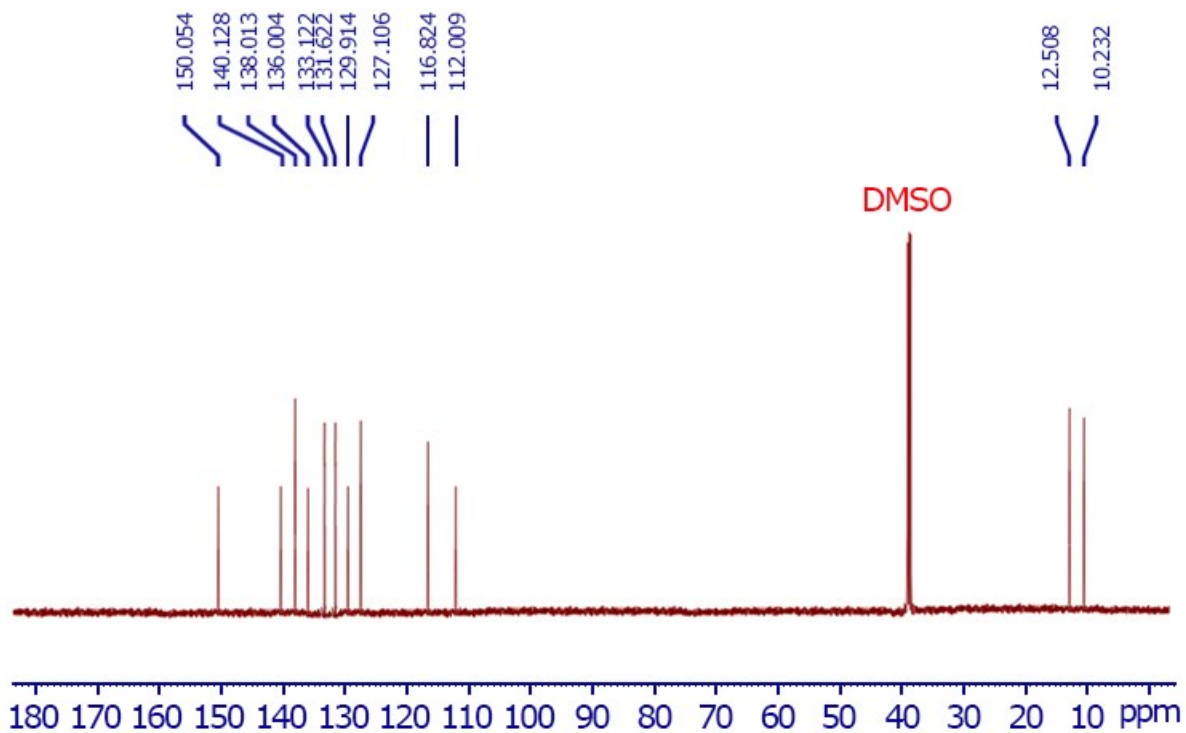

**Fig. S4.**  $^{13}\text{C}$  NMR spectrum of ligand Pcyd- BODIPY ( $\text{DMSO-}d_6$ ).

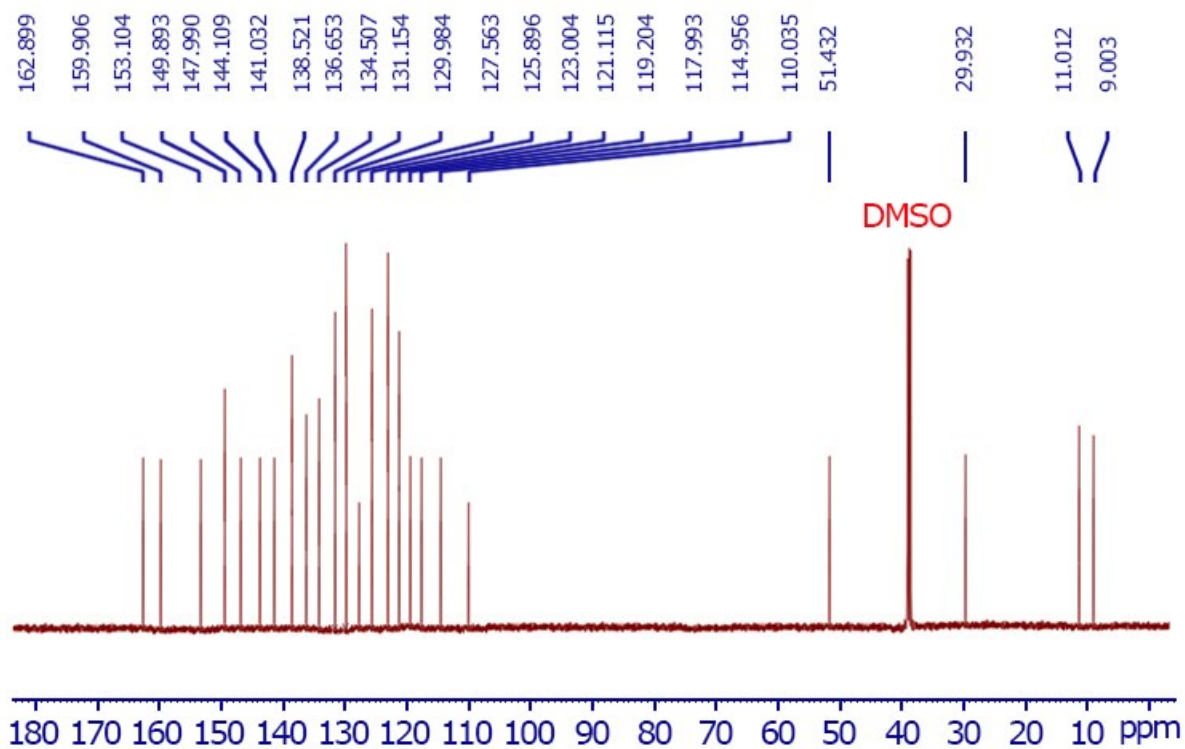

**Fig. S5.**  $^{13}\text{C}$  NMR spectrum of complex **1** ( $\text{DMSO-}d_6$ ).

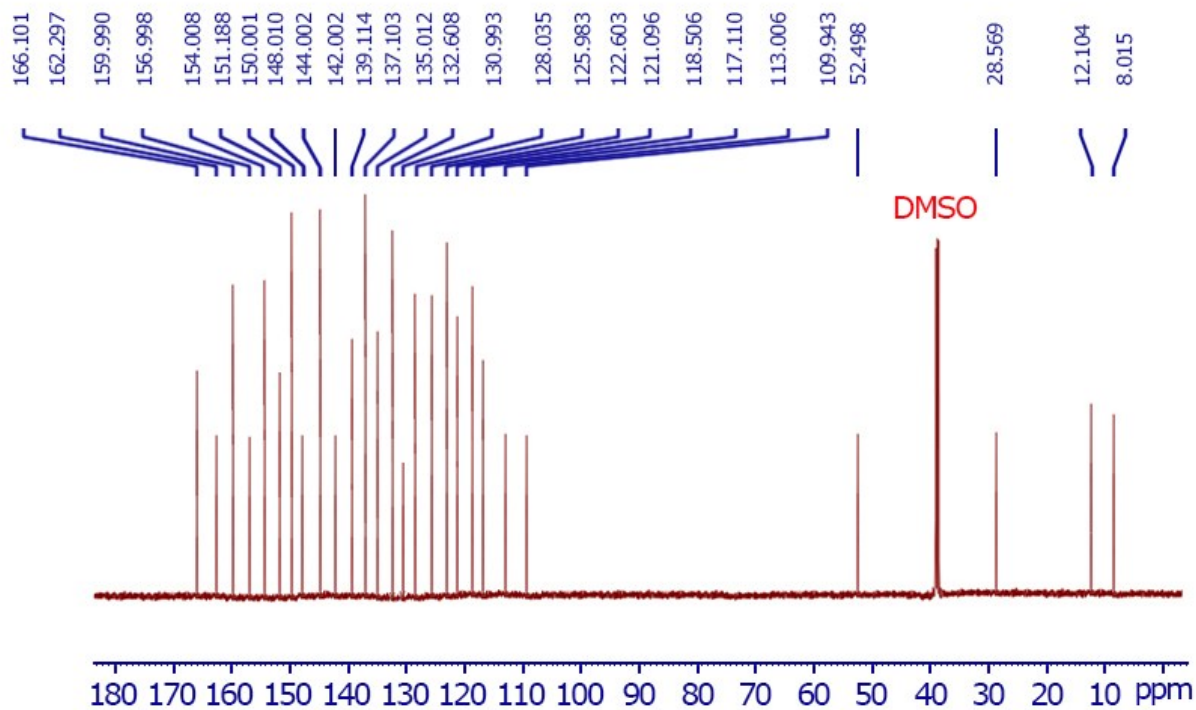

**Fig. S6.**  $^{13}\text{C}$  NMR spectrum of complex **2** ( $\text{DMSO-}d_6$ ).

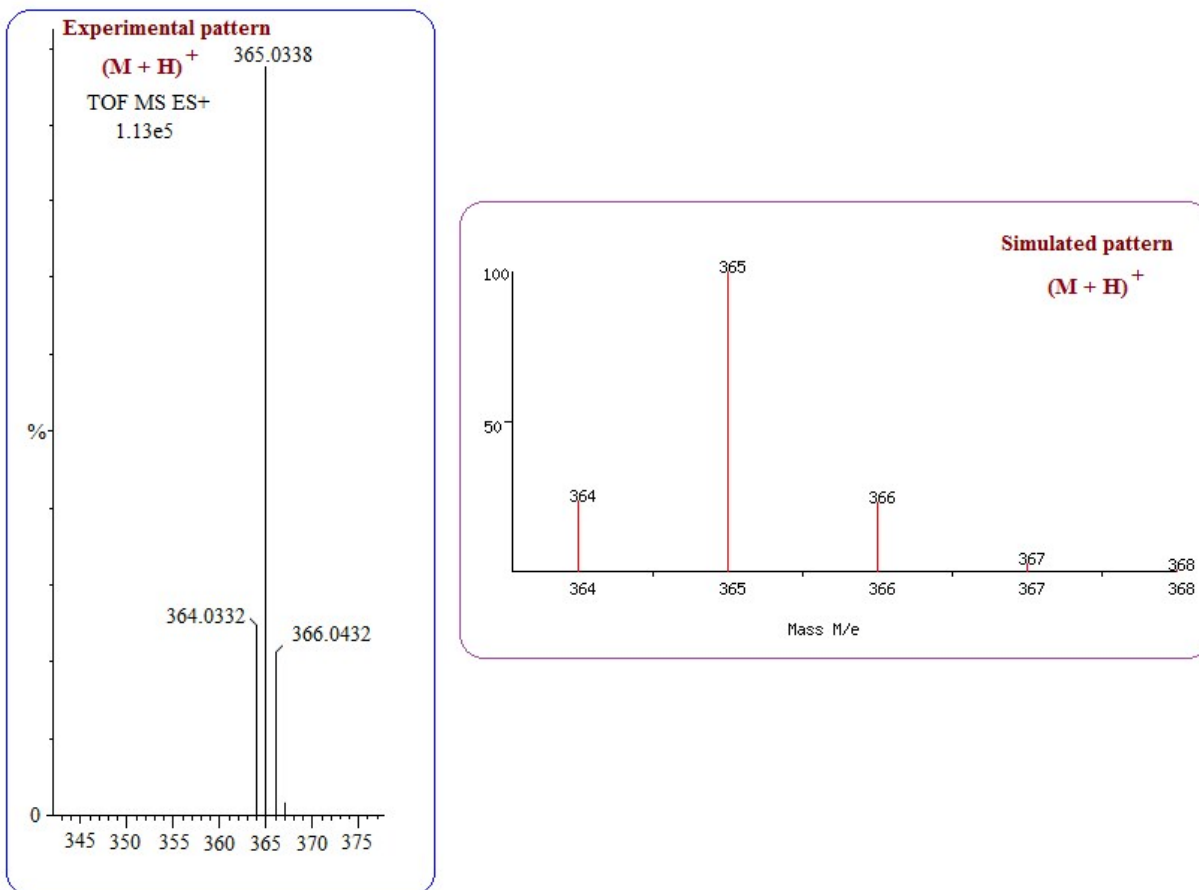

**Fig. S7.** TOF MS spectrum of ligand Pcyd- BODIPY.



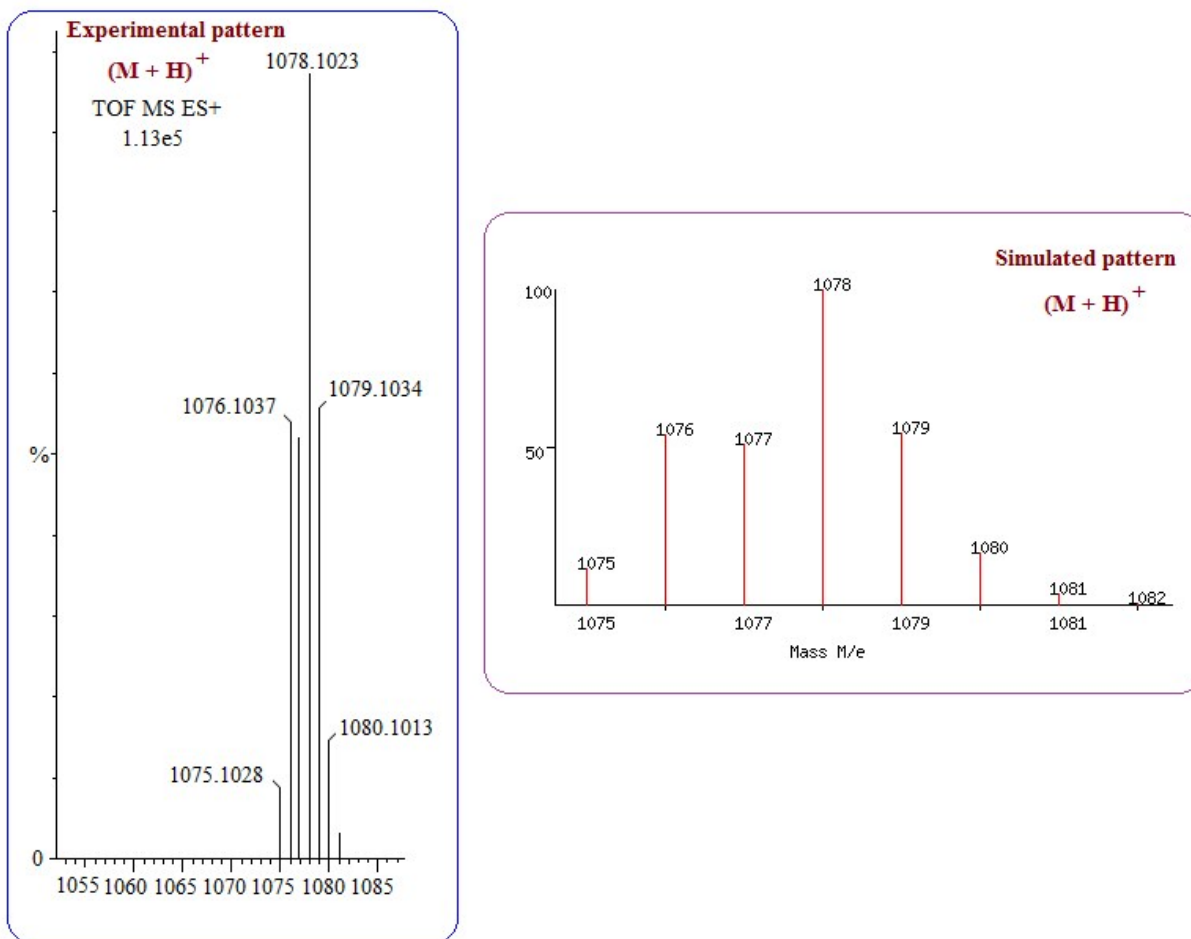

**Fig. S8.** TOF MS spectrum of complex 1.

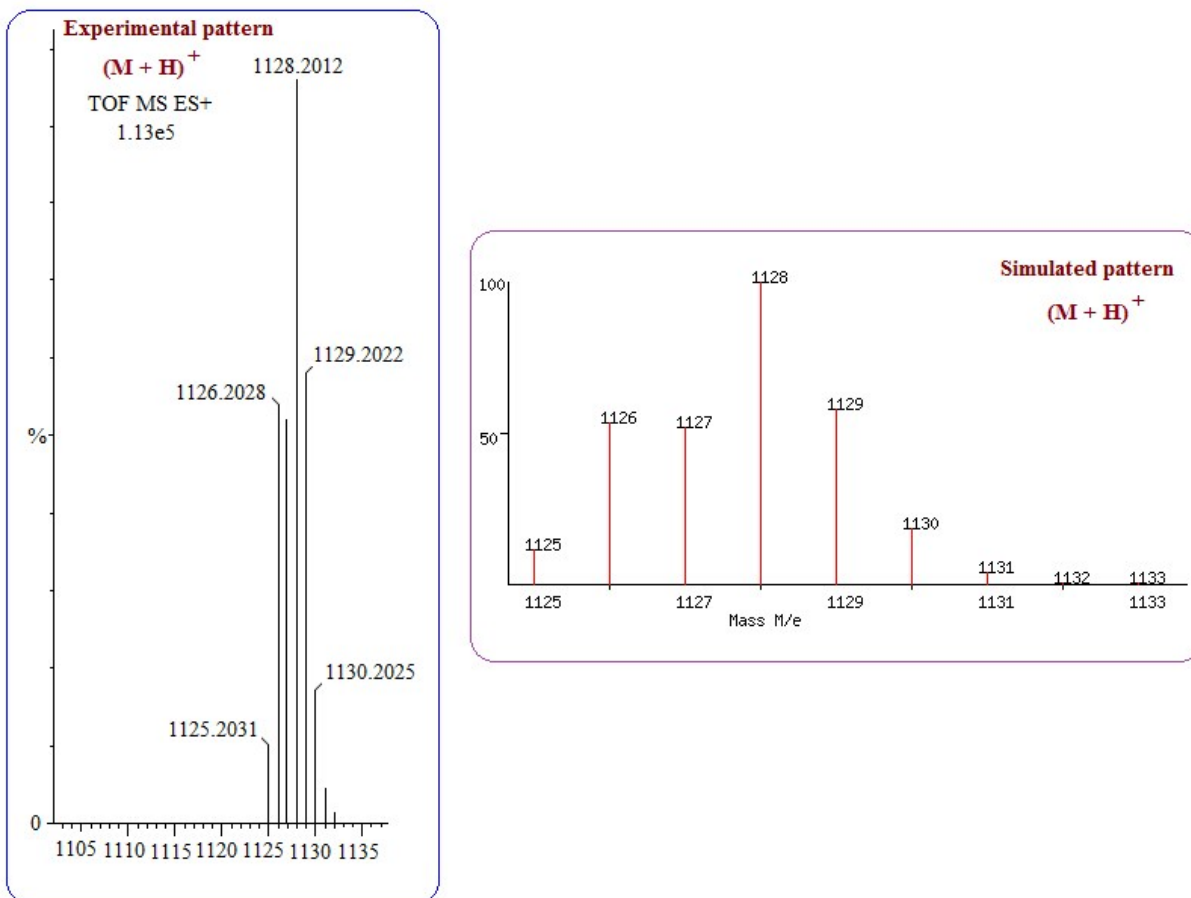

**Fig. S9.** TOF MS spectrum of complex 2.

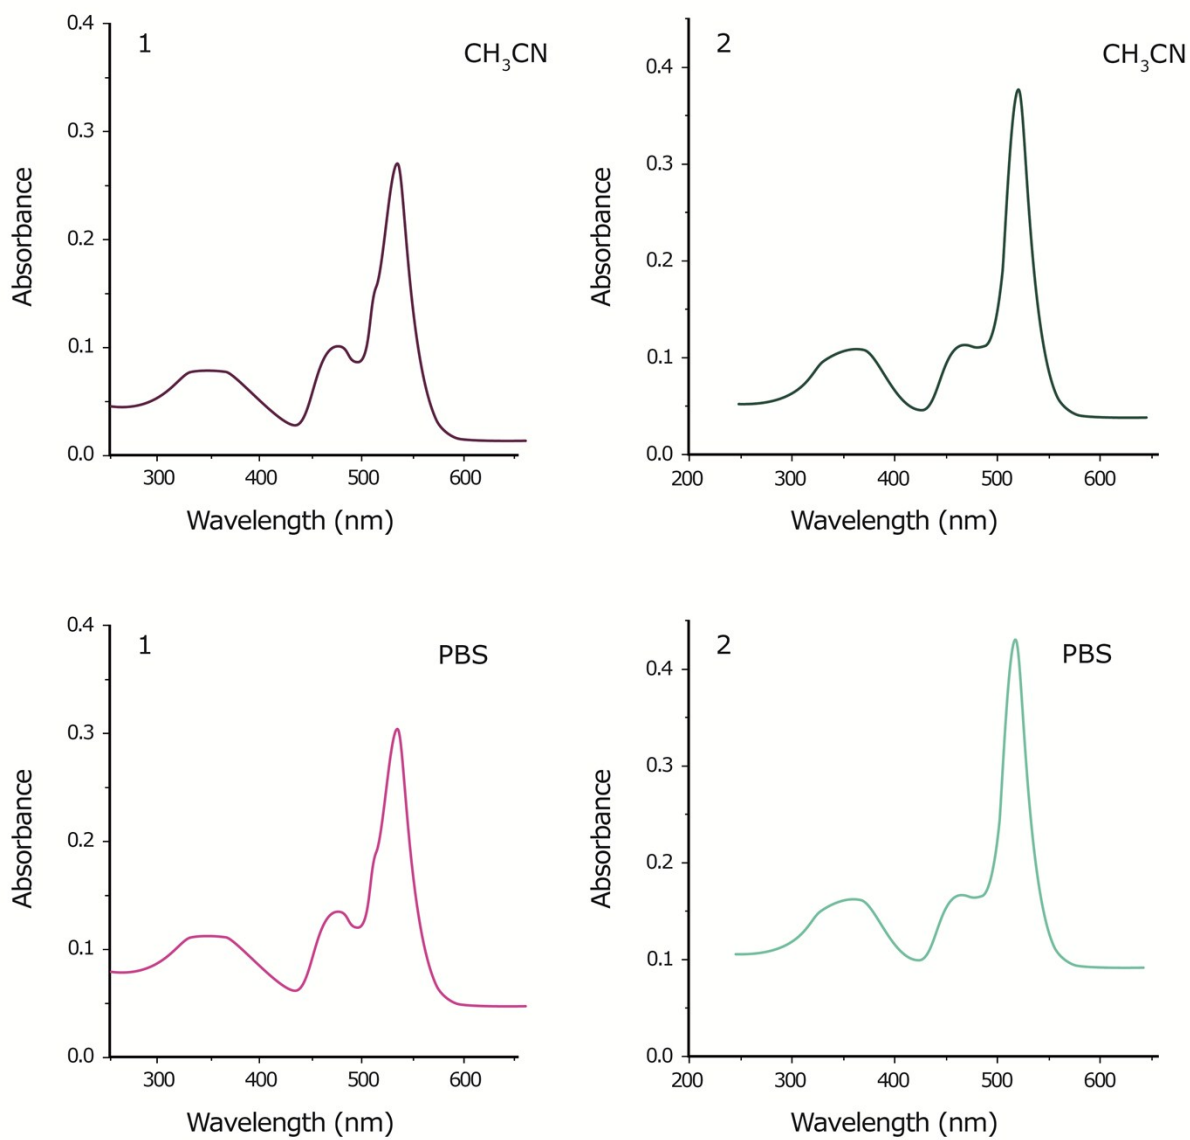

**Figure. S10.** UV/Vis spectra of complexes **1** and **2** in CH<sub>3</sub>CN and PBS at 298 K.

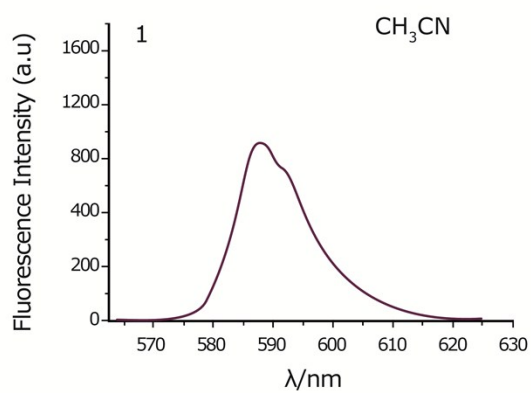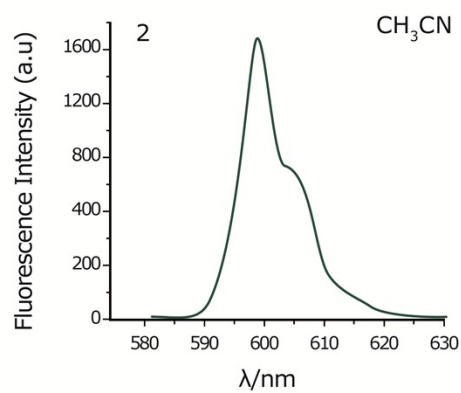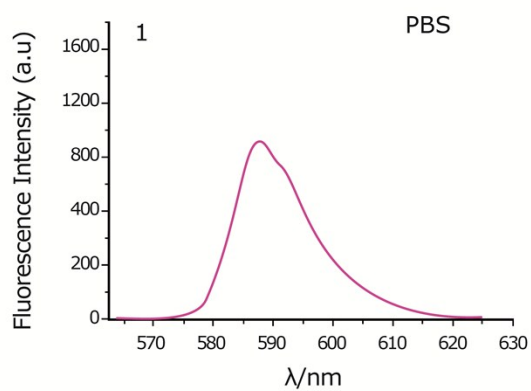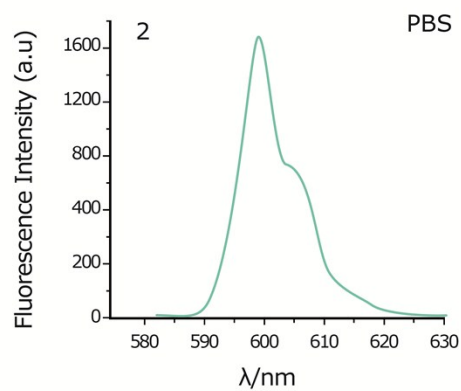

**Figure. S11.** Emission spectra of complexes **1** and **2** in CH<sub>3</sub>CN and PBS at 298 K.

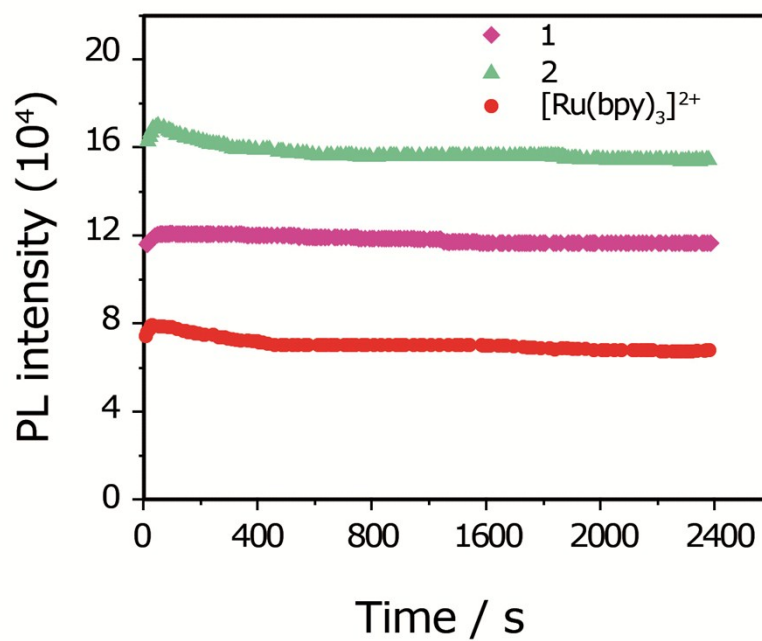

**Figure. S12.** Photobleaching fluorescent intensity of complexes **1** and **2** under continuous irradiation (500 nm) in Tris-HCl buffer (5 mM Tris, 50 mM NaCl, pH = 7.4).

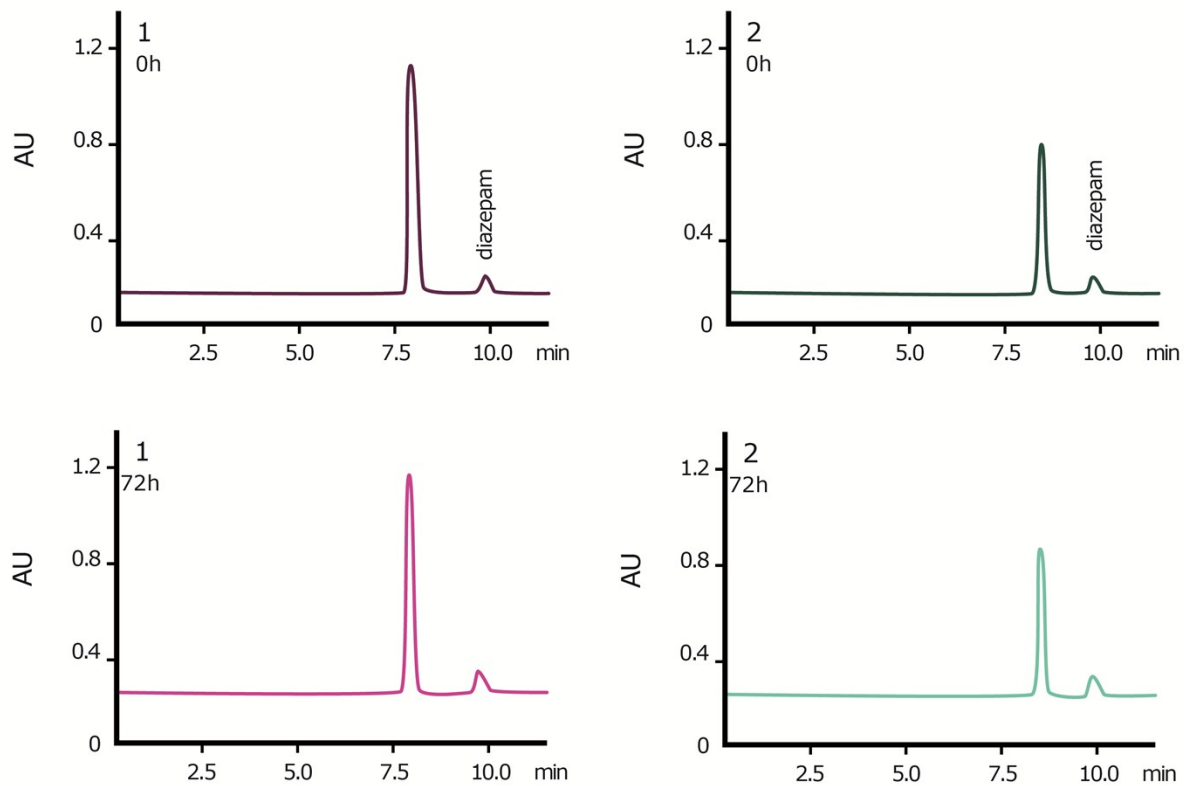

**Fig. S13.** LC-UV traces of plasma incubated with complexes **1** and **2** (20  $\mu$ M, 37  $^{\circ}$ C) at t = 0 and 72 h. (Diazepam was used as internal standard).

**Table S1.** Photophysical data of complexes **1** and **2**.

| Complex  | UV/Vis $\lambda$ [nm] | Emission <sup>[a]</sup> $\lambda$ [nm] | $(\Phi_{em})$ <sup>[b]</sup> | Lifetimes [ns] <sup>[c]</sup> |
|----------|-----------------------|----------------------------------------|------------------------------|-------------------------------|
| <b>1</b> | ACN: 350, 477, 541    | ACN: 588                               | 1.98                         | 702                           |
|          | PBS: 349, 478, 543    | PBS: 587                               |                              |                               |
| <b>2</b> | ACN: 358, 463, 526    | ACN: 598                               | 2.13                         | 728                           |
|          | PBS: 355, 465, 528    | PBS: 599                               |                              |                               |

[a] Emission spectra recorded in ACN (acetonitrile).

[b]  $\Phi_{em}$  refers to the luminescence quantum yield and were calculated according to literature procedures. \*

[c] Lifetimes evaluated ACN (acetonitrile).

\* G. A. Crosby and J. N. Demas, *J. Phys. Chem.* 1971, **75**, 991-1024.

**Table S2.** Singlet oxygen quantum yields upon irradiation at 500 nm.

|                | <b>1</b> | <b>2</b> |
|----------------|----------|----------|
| PBS (indirect) | 2%       | 3%       |
| ACN (direct)   | 79%      | 92%      |
| ACN (indirect) | 72%      | 88%      |



**Table S3.** Ratio of peak areas of complex/diazepam

|          | <b>1</b> | <b>2</b> |
|----------|----------|----------|
| t = 0 h  | 8.92     | 9.58     |
| t = 72 h | 8.88     | 9.52     |
